# Supplementary material for: PDGFR-β+ fibroblasts deteriorate survival in human solid tumors: a meta-analysis
Source: PubMed Central journal article supplement (PMC8202854; doi:10.18632/aging.202952), 2021-05-03
Supplement: aging-13-202952-s001.pdf [file aging-13-202952-s001.pdf]

## SUPPLEMENTARY FIGURES

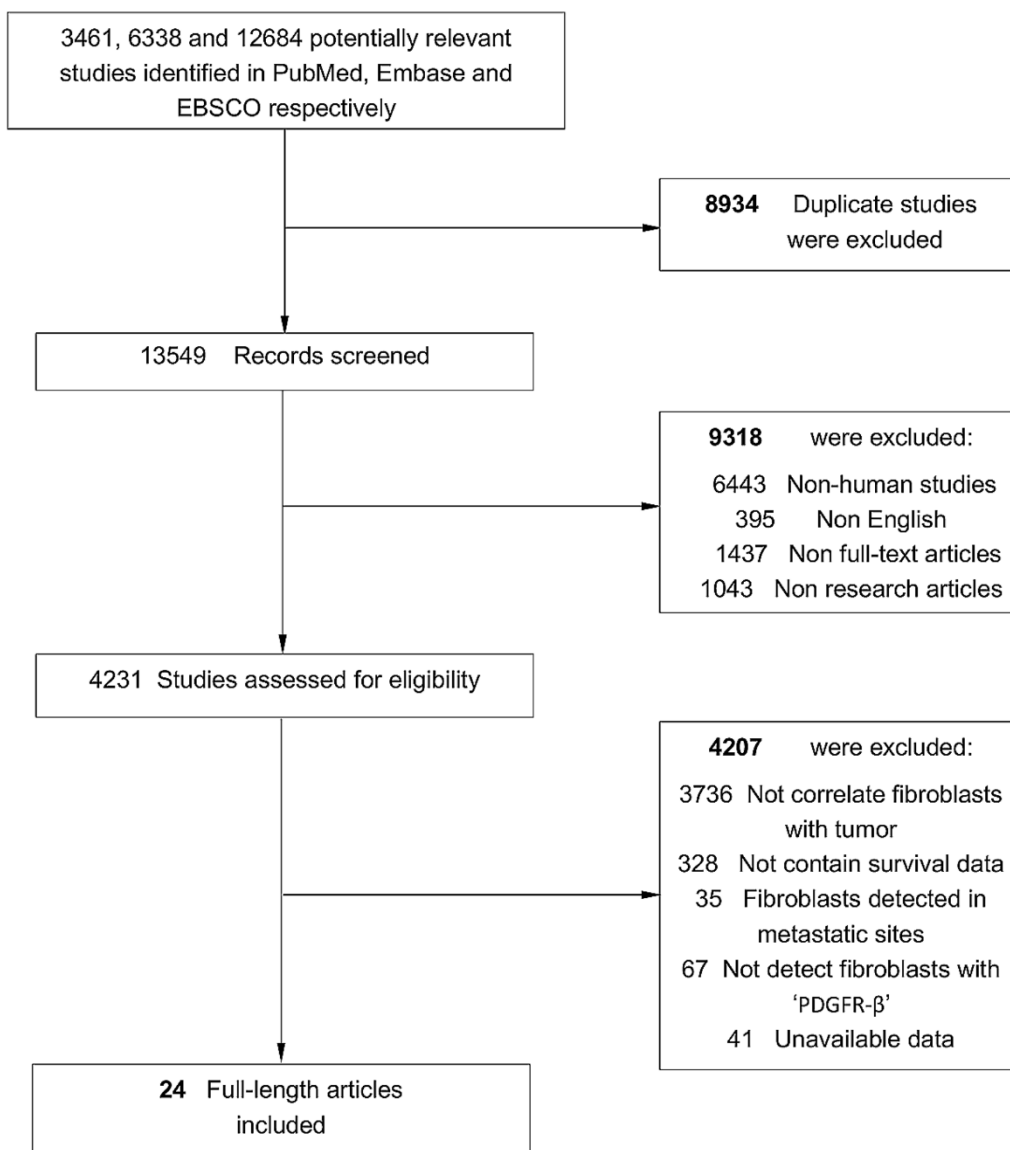

Supplementary Figure 1. Flow chart diagram of study selection.

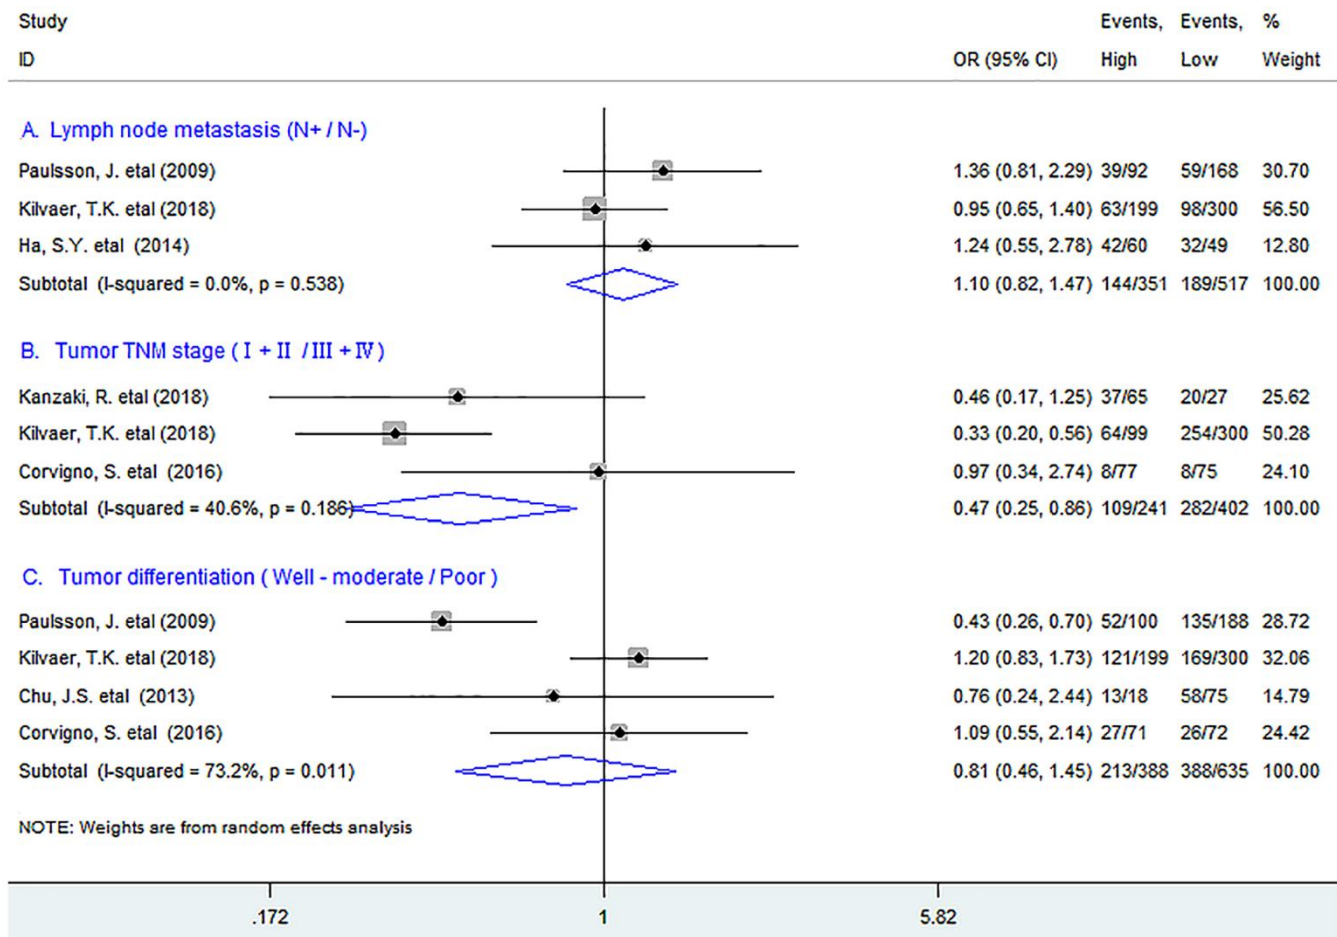

**Supplementary Figure 2.** Forest plots indicating ORs of the association between PDGFR-β+ fibroblast infiltration and clinicopathological features such as lymph node metastasis (A), tumor TNM stage (B), and tumor differentiation (C). ORs: odds ratios.

## A OS

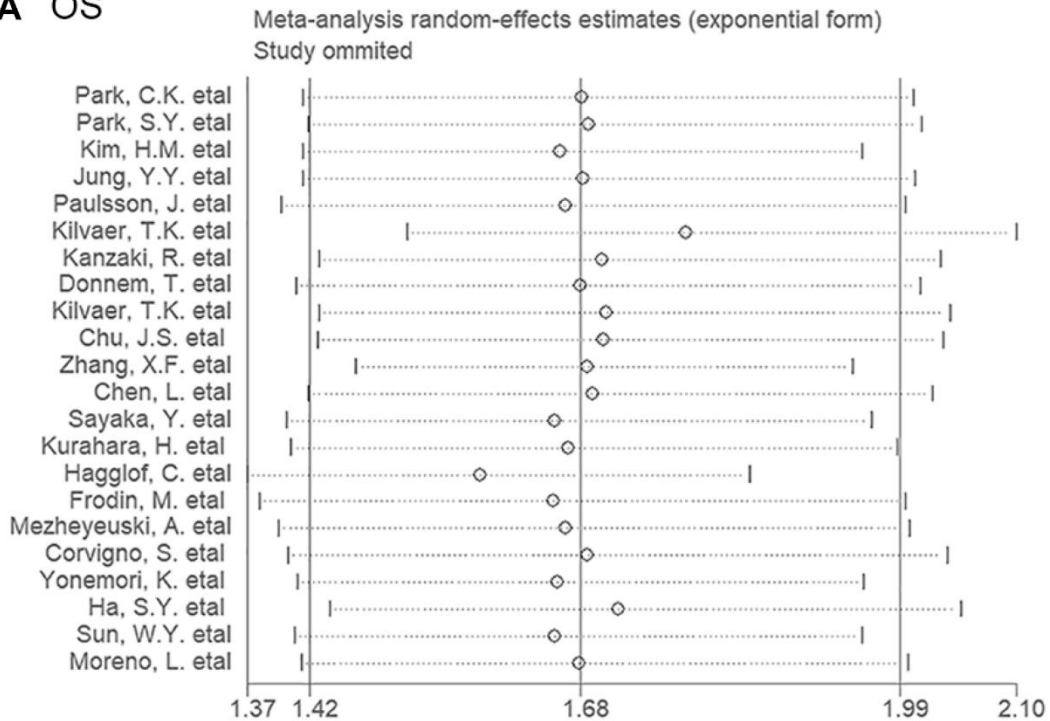

## B DFS

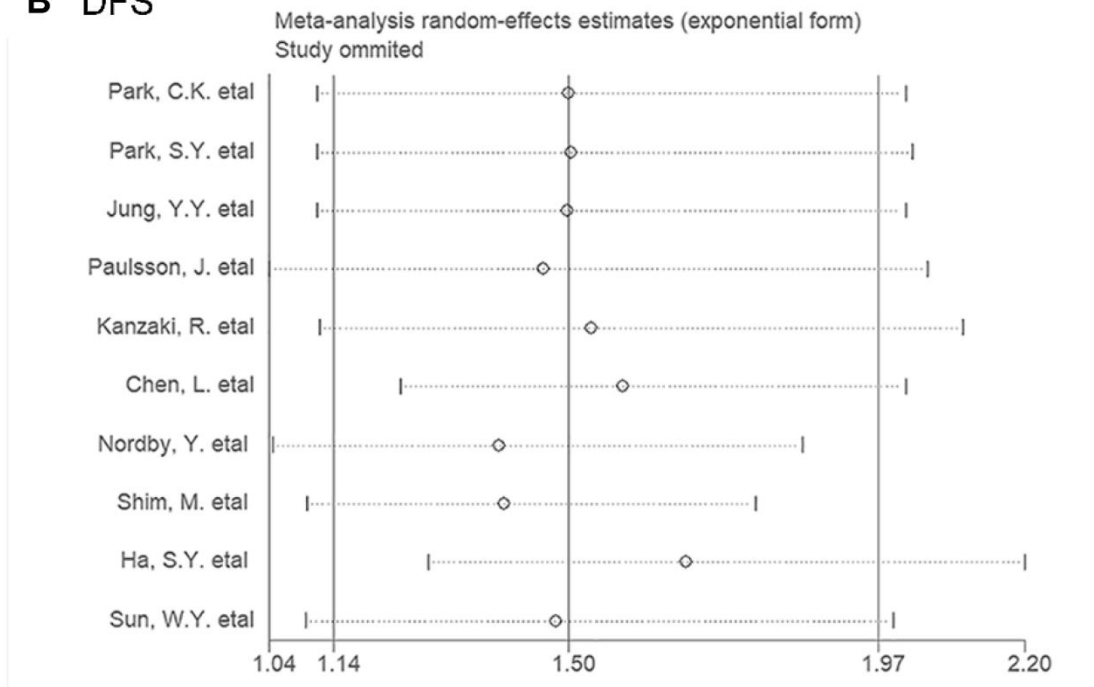

**Supplementary Figure 3.** Plots describing the influence of individual studies on the overall HRs for OS (A) and DFS (B) in solid tumors. HRs: hazard ratios; OS: overall survival; DFS: disease-free survival.

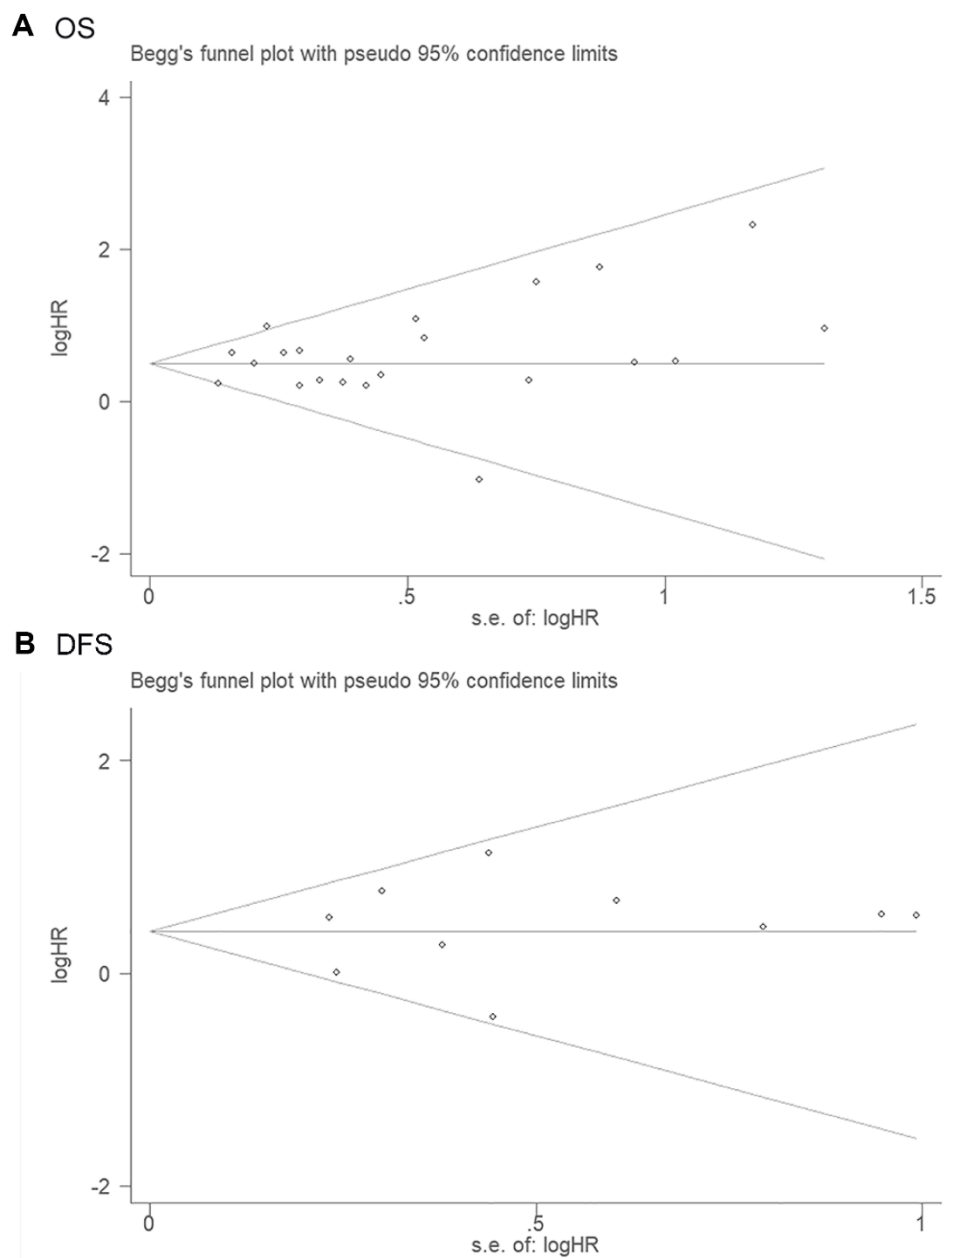

**Supplementary Figure 4.** Funnel plots for publication bias between PDGFR- $\beta^+$  fibroblasts and OS (A) and DFS (B) in solid tumors. OS: overall survival; DFS: disease-free survival.
